# Supplementary material
Source: bioRxiv or medRxiv preprint supplement (https://www.biorxiv.org/highwire/filestream/102061/field_highwire_adjunct_files/0/331330-1.pdf)

## SUPPLEMENTARY DATA

### Figure S1

Simulated dendrogram of four samples. A. Simulated dendrogram tree with four samples and 10 sub-groups for each sample. B-C. ClusterMap tree cut results for the simulated tree at edge cutoff of 0.1 and 0.2. D. Scheme of the separability calculation.

### Figure S2

A-B. Feature plot for identifying cell types. C-D. Gene ontology and pathway analysis for the new marker genes of groups in combined sample (Figure 4C) using Metascape. C. luminal progenitors groups 1 and 11. D. Basal groups 3 and 7.

### Figure S3

A. Pre-analysis for the immune stimulated datasets. B. Circos plot of the matched sub groups. C-D. Feature plot for identifying cell types.

### Figure S4

Analysis for PBMCs replicates. A. Pre-analysis of PBMC 4K. B. Pre-analysis of PBMC 8K. C. Heat map of marker genes. D. ClusterMap results. E-F. Feature plots to identify cell types.

### Figure S5

CCA analysis and clustering for epithelial cell datasets as in Figure3, 4. A. t-SNE plot of clustered cells. B. t-SNE plot with cells colored by sample. C. Feature plot for identifying cell types. D. t-SNE plot with highlighted cells of group 2 and group 10, defined as in Figure 4.

Figure S1

A

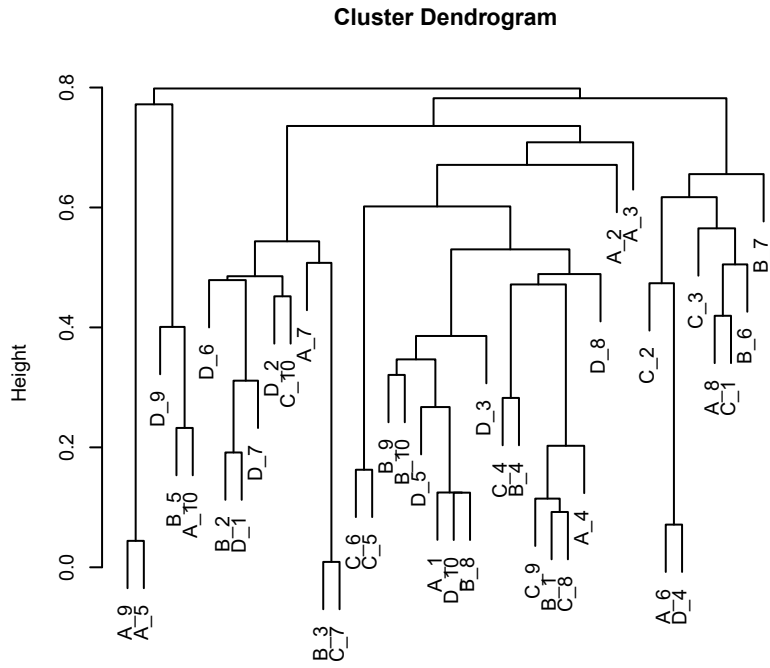

B

edge\_cutoff = 0.1

|    | A       | B        | C       | D    | similarity | regroup |
|----|---------|----------|---------|------|------------|---------|
| 1  | NA      | B_3      | C_7     | NA   | 0.99       | 1       |
| 2  | A_9;A_5 | NA       | NA      | NA   | 0.96       | 2       |
| 3  | A_6     | NA       | NA      | D_4  | 0.93       | 3       |
| 4  | A_1     | B_8      | NA      | D_10 | 0.88       | 4       |
| 5  | NA      | NA       | C_6;C_5 | NA   | 0.84       | 5       |
| 6  | NA      | B_2      | NA      | D_1  | 0.81       | 6       |
| 7  | A_4     | B_1      | C_9;C_8 | NA   | 0.8        | 7       |
| 8  | A_10    | B_5      | NA      | NA   | 0.77       | 8       |
| 9  | NA      | B_4      | C_4     | NA   | 0.72       | 9       |
| 10 | NA      | B_9;B_10 | NA      | NA   | 0.68       | 10      |
| 11 | NA      | NA       | C_10    | D_2  | 0.55       | 11      |
| 12 | A_8     | B_6      | C_3;C_1 | NA   | 0.43       | 12      |
| 13 | NA      | NA       | NA      | D_9  | NA         | 13      |
| 14 | NA      | NA       | NA      | D_6  | NA         | 14      |
| 15 | NA      | NA       | NA      | D_7  | NA         | 15      |
| 16 | A_7     | NA       | NA      | NA   | NA         | 16      |
| 17 | NA      | NA       | NA      | D_5  | NA         | 17      |
| 18 | NA      | NA       | NA      | D_3  | NA         | 18      |
| 19 | NA      | NA       | NA      | D_8  | NA         | 19      |
| 20 | A_2     | NA       | NA      | NA   | NA         | 20      |
| 21 | A_3     | NA       | NA      | NA   | NA         | 21      |
| 22 | NA      | NA       | C_2     | NA   | NA         | 22      |
| 23 | NA      | B_7      | NA      | NA   | NA         | 23      |

C

edge\_cutoff = 0.2

|    | A       | B            | C       | D               | similarity | regroup |
|----|---------|--------------|---------|-----------------|------------|---------|
| 1  | NA      | B_3          | C_7     | NA              | 0.99       | 1       |
| 2  | A_9;A_5 | NA           | NA      | NA              | 0.96       | 2       |
| 3  | A_6     | NA           | NA      | D_4             | 0.93       | 3       |
| 4  | NA      | NA           | C_6;C_5 | NA              | 0.84       | 4       |
| 5  | A_4     | B_1          | C_9;C_8 | NA              | 0.8        | 5       |
| 6  | NA      | B_4          | C_4     | NA              | 0.72       | 6       |
| 7  | A_1     | B_9;B_10;B_8 | NA      | D_5;D_10;D_3    | 0.61       | 7       |
| 8  | A_10    | B_5          | NA      | D_9             | 0.6        | 8       |
| 9  | NA      | B_2          | C_10    | D_6;D_1;D_7;D_2 | 0.51       | 9       |
| 10 | A_8     | B_6          | C_3;C_1 | NA              | 0.43       | 10      |
| 11 | A_7     | NA           | NA      | NA              | NA         | 11      |
| 12 | NA      | NA           | NA      | D_8             | NA         | 12      |
| 13 | A_2     | NA           | NA      | NA              | NA         | 13      |
| 14 | A_3     | NA           | NA      | NA              | NA         | 14      |
| 15 | NA      | NA           | C_2     | NA              | NA         | 15      |
| 16 | NA      | B_7          | NA      | NA              | NA         | 16      |

D

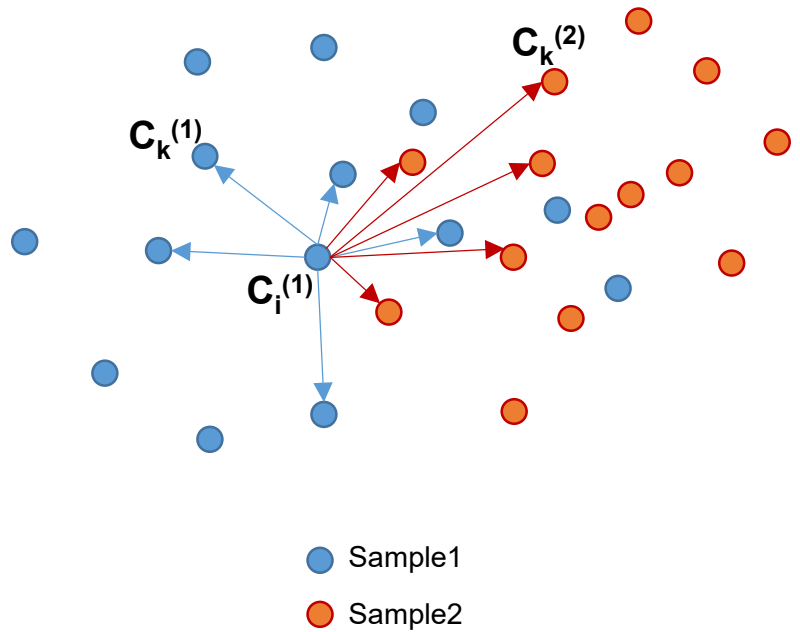

Figure S2

A

Diestrus (p7d)

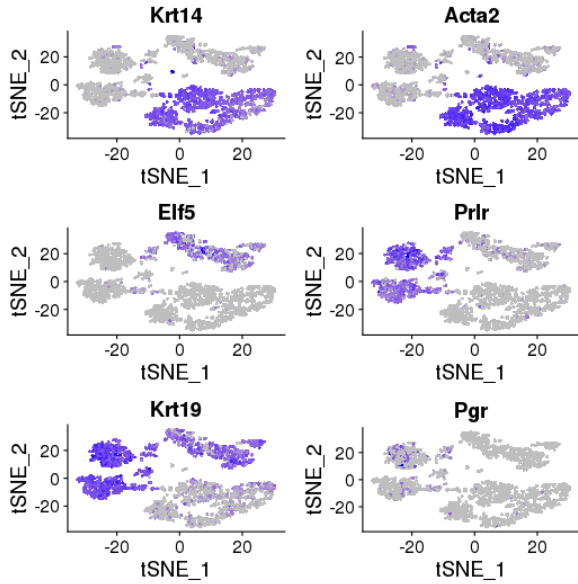

B

Estrus (p7e)

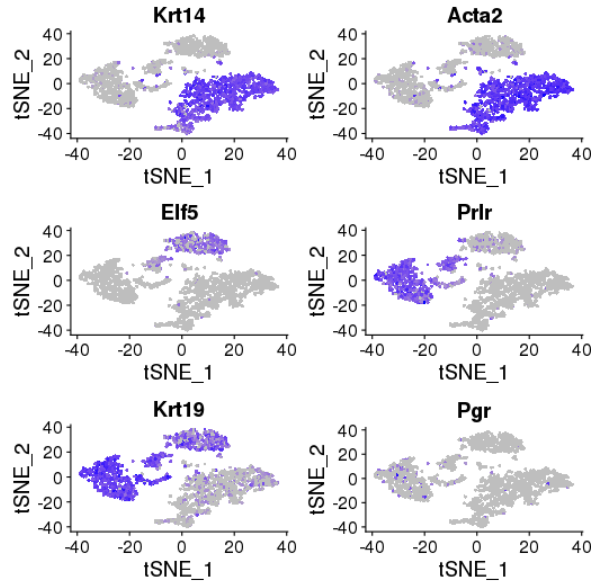

C

luminal progenitors Group1

luminal progenitors Group11, diestrus only

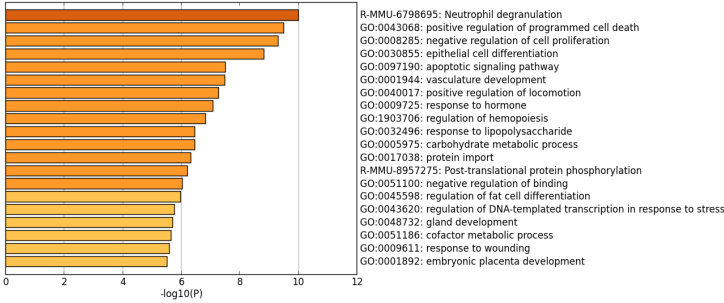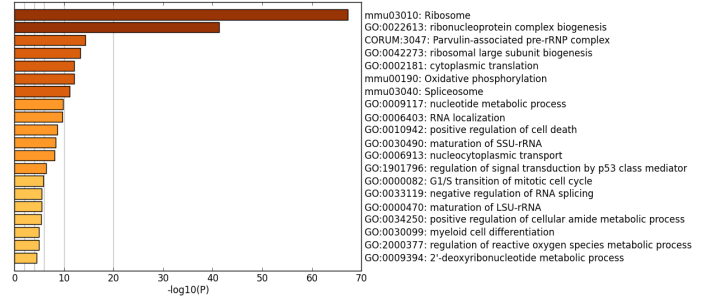

D

Basal Group 3, estrus enriched

Basal Group 7, diestrus

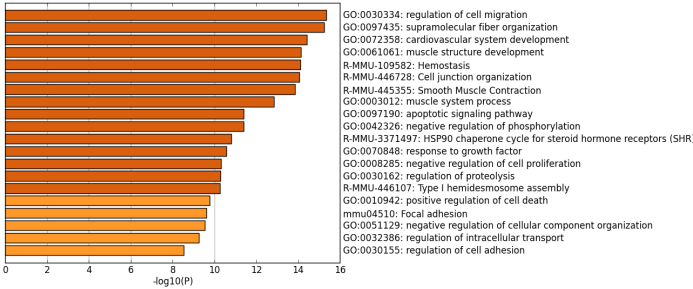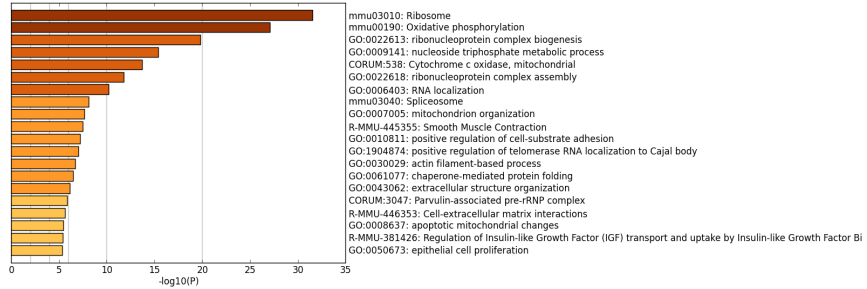

Figure S3

A

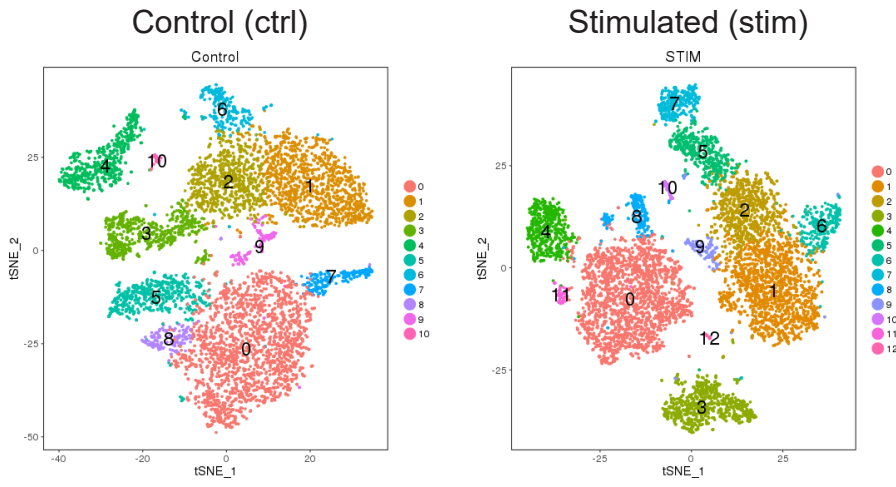

B

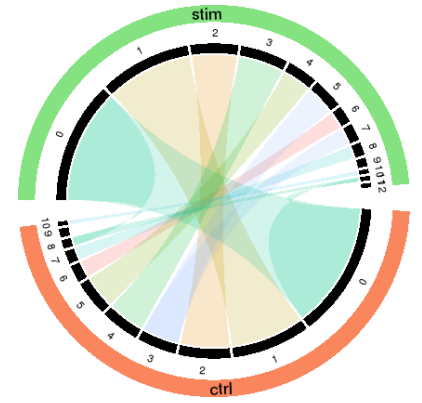

C

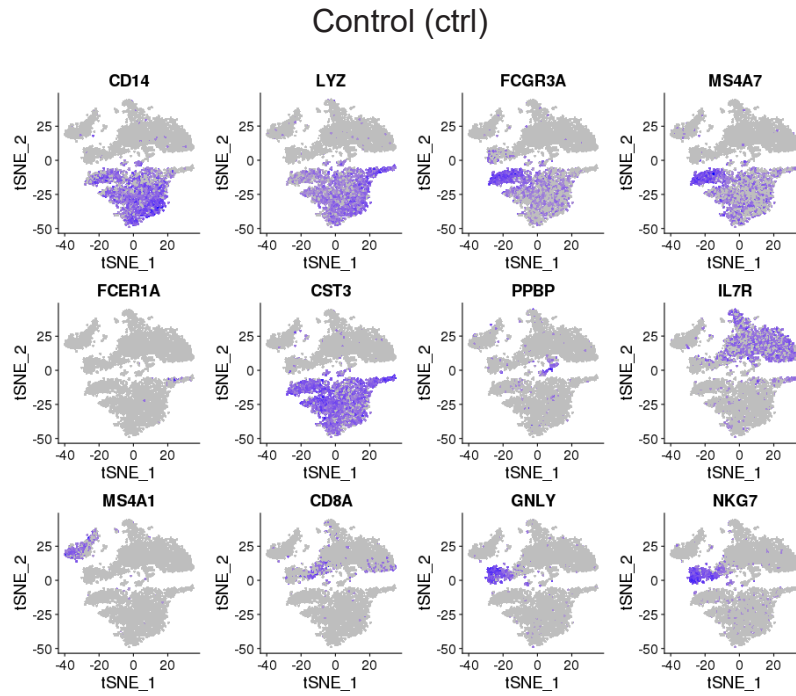

D

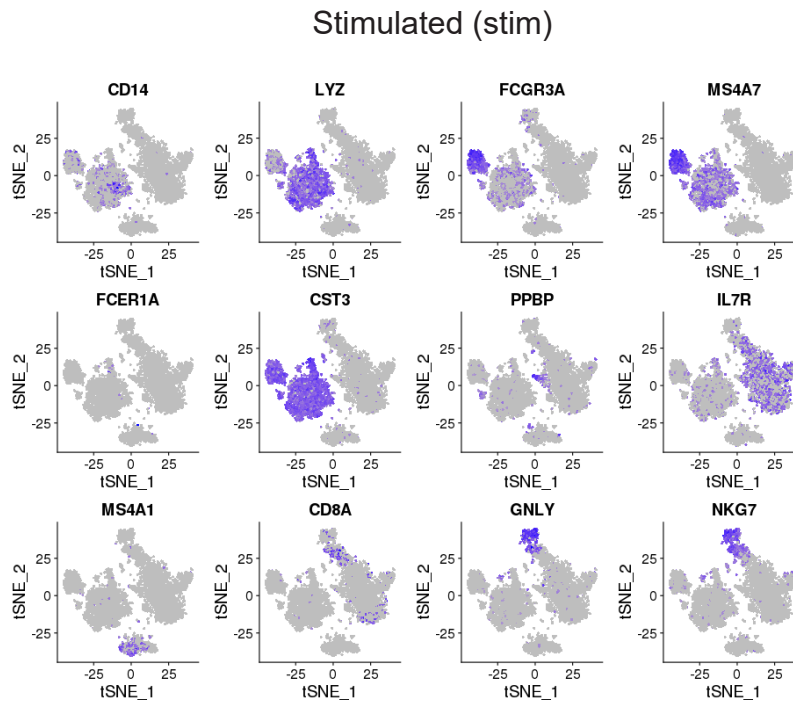

Figure S4

A

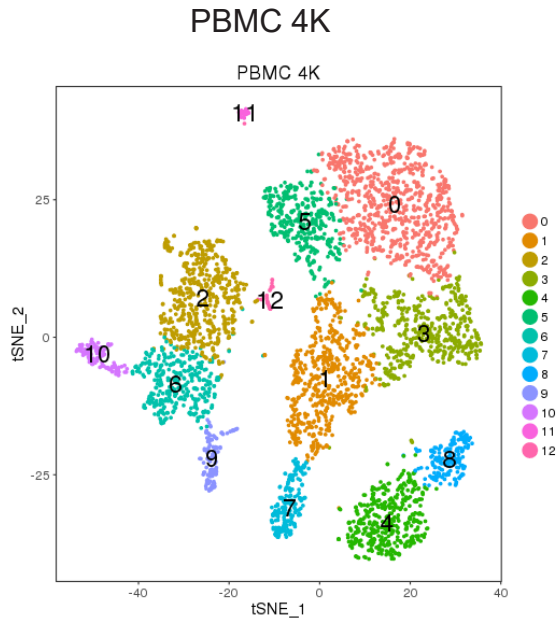

B

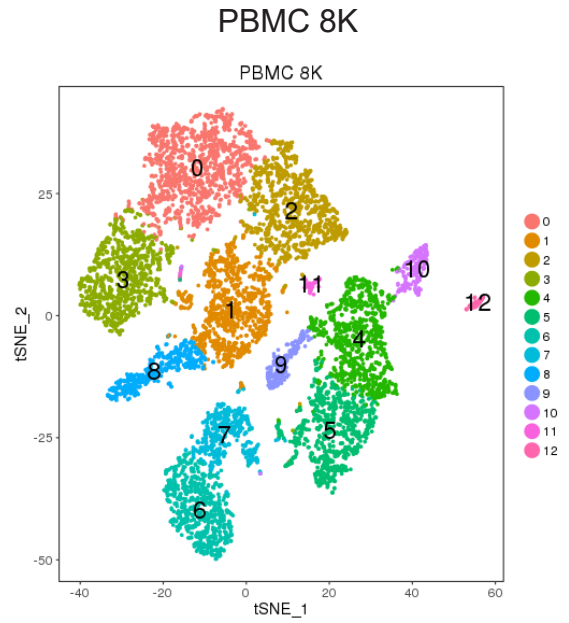

C

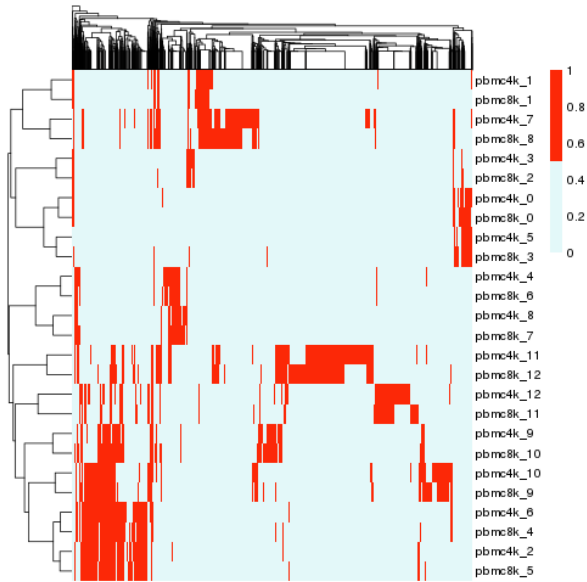

D

|    | pbmc4k    | pbmc8k    | similarity | regroup | pbmc4k_cell_perc | pbmc8k_cell_perc | pbmc4k.vs.pbmc8k_separability |
|----|-----------|-----------|------------|---------|------------------|------------------|-------------------------------|
| 1  | pbmc4k_4  | pbmc8k_6  | 0.83       | 1       | 0.1              | 0.09             | -0.09                         |
| 2  | pbmc4k_6  | pbmc8k_4  | 0.82       | 2       | 0.08             | 0.11             | 0.03                          |
| 3  | pbmc4k_2  | pbmc8k_5  | 0.82       | 3       | 0.13             | 0.1              | -0.01                         |
| 4  | pbmc4k_0  | pbmc8k_0  | 0.79       | 4       | 0.19             | 0.16             | -0.02                         |
| 5  | pbmc4k_3  | pbmc8k_2  | 0.76       | 5       | 0.12             | 0.12             | -0.08                         |
| 6  | pbmc4k_5  | pbmc8k_3  | 0.76       | 6       | 0.09             | 0.12             | -0.07                         |
| 7  | pbmc4k_10 | pbmc8k_9  | 0.74       | 7       | 0.03             | 0.03             | -0.08                         |
| 8  | pbmc4k_9  | pbmc8k_10 | 0.71       | 8       | 0.03             | 0.03             | -0.01                         |
| 9  | pbmc4k_8  | pbmc8k_7  | 0.71       | 9       | 0.04             | 0.06             | 0.05                          |
| 10 | pbmc4k_1  | pbmc8k_1  | 0.68       | 10      | 0.13             | 0.12             | -0.08                         |
| 11 | pbmc4k_7  | pbmc8k_8  | 0.66       | 11      | 0.04             | 0.06             | 0.05                          |
| 12 | pbmc4k_11 | pbmc8k_12 | 0.61       | 12      | 0.01             | 0.01             | -0.08                         |
| 13 | pbmc4k_12 | pbmc8k_11 | 0.48       | 13      | 0.01             | 0.01             | -0.02                         |

E

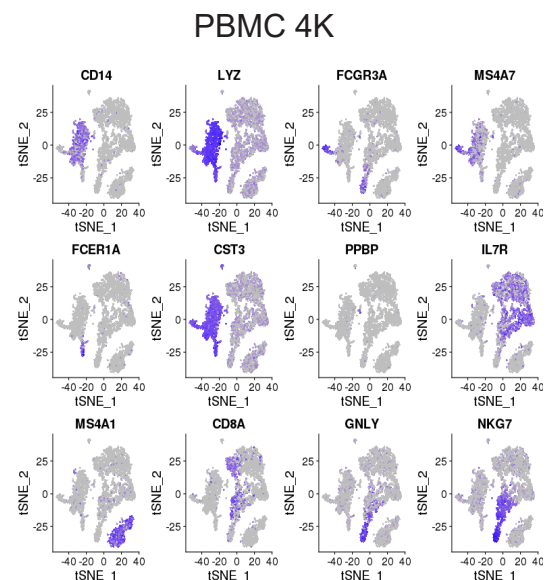

F

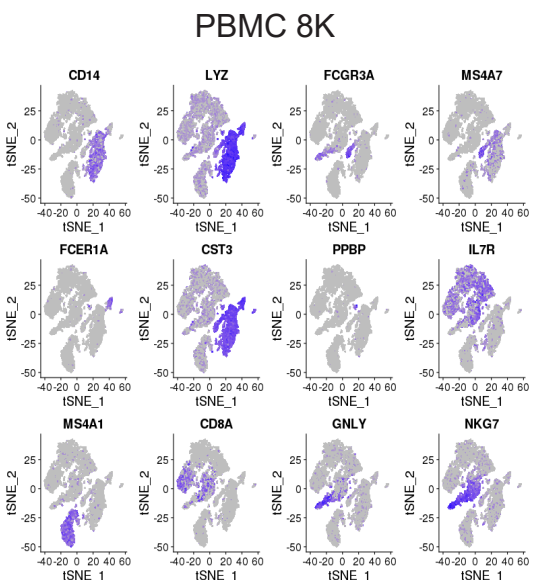

Figure S5

A

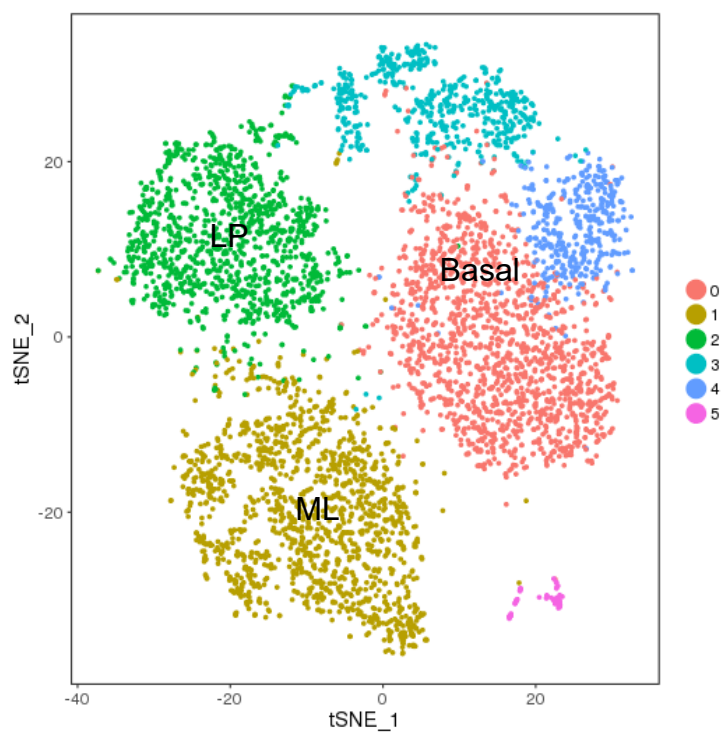

B

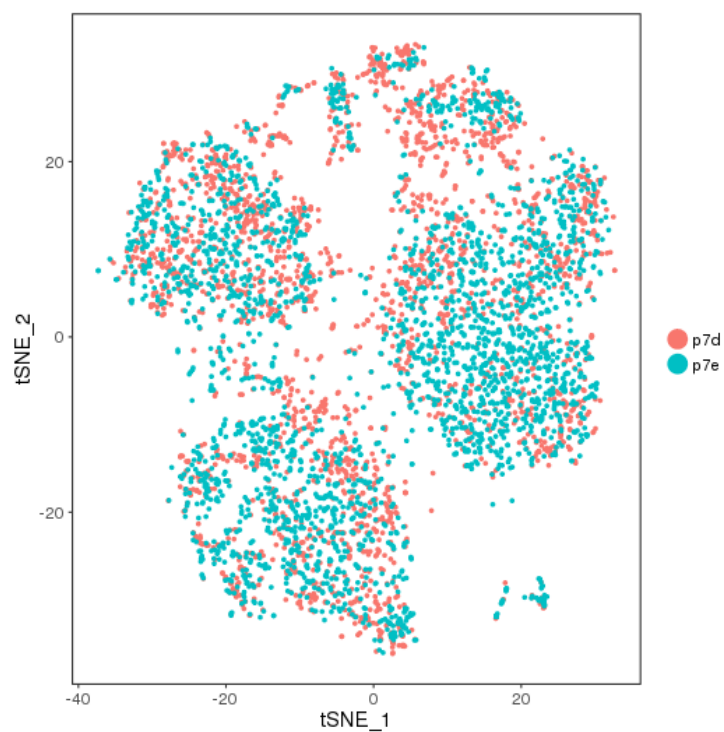

C

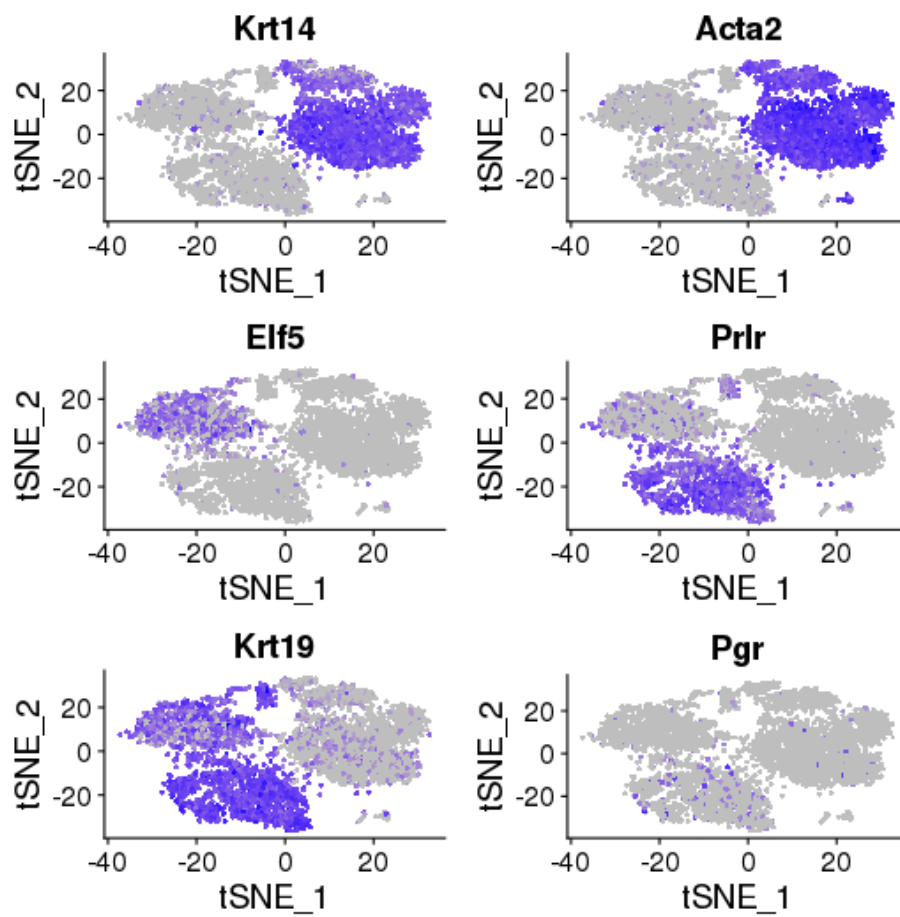

Supplement: Supplementary file [file 331330-1.pdf]
